# Supplementary material
Source: publisher figshare collection journal article supplement (https://wiley.figshare.com/articles/dataset/_/3513782)
Supplement: Supplementary file 1 [file 1 › appendix-A.htm]

Ecological Archives A018-056-A1


### *Ecological Archives* A018-056-A1

### **Inés Ibáñez, James S. Clark, and Michael C. Dietze. 2008. Evaluating the sources of potential migrant species: Implications under climate change. *Ecological Applications* 18:1664–1678.**

Appendix A. Selection of some of the sub-models tested. Click here for a PDF file of the appendix.

---


[Back to A018-056]
