# Supplementary material
Source: publisher figshare collection journal article supplement (https://wiley.figshare.com/articles/dataset/_/3513782)
Supplement: Supplementary file 1 [file 1 › appendix-A.pdf]

*Ecological Archives* A018-056-A1

**Inés Ibáñez, James S. Clark, and Michael C. Dietze. 2008. Evaluating the sources of potential migrant species: Implications under climate change. *Ecological Applications* 18:1664–1678.**

**APPENDIX A1.** Selection of some of the sub-models tested.

| Sub-Model                                                     | Model description                                                                                                                                                                                                                                                            |
|---------------------------------------------------------------|------------------------------------------------------------------------------------------------------------------------------------------------------------------------------------------------------------------------------------------------------------------------------|
| Sub-Model A<br>(whole array of<br>covariates)                 | $\log it(s_{pit}) = \beta_1 SA_p + \beta_2 P_p + \beta_3 x1_t Soilm_{pt} + \beta_4 Herb_{pt} P_p + \beta_5 Light_{pt}$ $+ \beta_6 x2_t Wintertemp_t SA_p(orP_p) + \beta_7 origin_{ipt} SA_p(orP_p) + \beta_8 Age_{ipt}$ $+ \beta_9 Cover_{pt} + \beta_{10} InitialSize_{ip}$ |
| Sub-Model B<br>(only fixed effects,<br>selected covariates)   | $\log it(s_{pit}) = \beta_1 SA_p + \beta_2 P_p + \beta_3 x1_t Soilm_{pt} + \beta_4 Herb_{pt} P_p + \beta_5 Light_{pt}$ $+ \beta_6 x2_t + \beta_7 origin_{ipt} SA_p(orP_p)$                                                                                                   |
| Sub-Model C<br>(plot random effects,<br>selected covariates)  | $\log it(s_{pit}) = \beta_1 SA_p + \beta_2 P_p + \beta_3 x1_t Soilm_{pt} + \beta_4 Herb_{pt} P_p + \beta_5 Light_{pt}$ $+ \beta_6 x2_t + \beta_7 origin_{ipt} SA_p(orP_p) + \gamma_p$                                                                                        |
| Sub-Model D<br>(census fixed effects,<br>selected covariates) | $\log it(s_{pit}) = \beta_1 SA_p + \beta_2 P_p + \beta_3 x1_t Soilm_{pt} + \beta_4 Herb_{pt} P_p + \beta_5 Light_{pt}$ $+ \beta_6 x2_t + \beta_7 origin_{ipt} SA_p(orP_p) + \lambda_t$                                                                                       |
| Sub-Model E<br>(error term, selected<br>covariates)           | $\log it(s_{pit}) = \beta_1 SA_p + \beta_2 P_p + \beta_3 x1_t Soilm_{pt} + \beta_4 Herb_{pt} P_p + \beta_5 Light_{pt}$ $+ \beta_6 x2_t + \beta_7 origin_{ipt} SA_p(orP_p) + \varepsilon_{pit}$                                                                               |

SA: Southern Appalachians, = 1 if the seedling was planted in this location, = 0 otherwise

P: Piedmont, = 1 if the seedling was planted in this location, = 0 otherwise

x1: summer census, = 1 if summer census, = 0 otherwise

x2: winter census, = 1 if winter census, = 0 other wise

*Soilm*: mean summer soil moisture (%)

*Wintertemp*: mean January minimum temperature (°C)

*Herb*: Herbivory protected, = 1 if the seedling was planted inside an enclosure, = 0 otherwise

*Light*: full sunlight (%). For some submodels light was also included into the model as % light reaching the ground, this parameter was then calculated as: %ground.light = %Light \* exp(- $k$  \* %cover), being  $k$  a dissipation constant that was also estimated.

*origin*: seed origin, = 1 if the seedling from a local seed, = 0 otherwise

*Age*: seedling age (years)

*InitialSize*: seedling size at the time of planting

*Cover*: percentage of ground vegetation cover

$\lambda_t$ : fixed effects for census,  $\lambda_t \sim Normal(0, 10000)$

$\gamma_p$ : random effects for plot,  $\gamma_p \sim Normal(0, \tau_\gamma^{-1})$   $\tau_\gamma \sim Gamma(0.01, 0.01)$

$\varepsilon_{pit}$ : error term,  $\varepsilon_{pit} \sim Normal(0, \tau_\varepsilon^{-1})$   $\tau_\varepsilon \sim Gamma(0.01, 0.01)$
